# Supplementary figures and images for: A three-electrode integrated electrochemical platform based on nanoporous gold for the simultaneous determination of hydroquinone and catechol with high selectivity
Source: Royal Society of Chemistry journal article supplement (doi:10.1039/d0an01746a), 2020-10-13

**a**

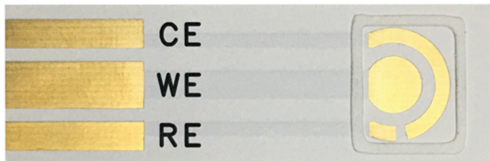

**b**

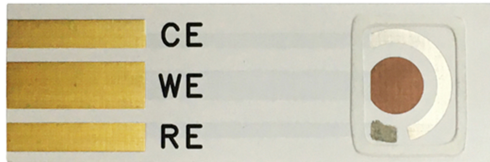

Supplement: d0an01746a2.pdf [file d0an01746a2.pdf]

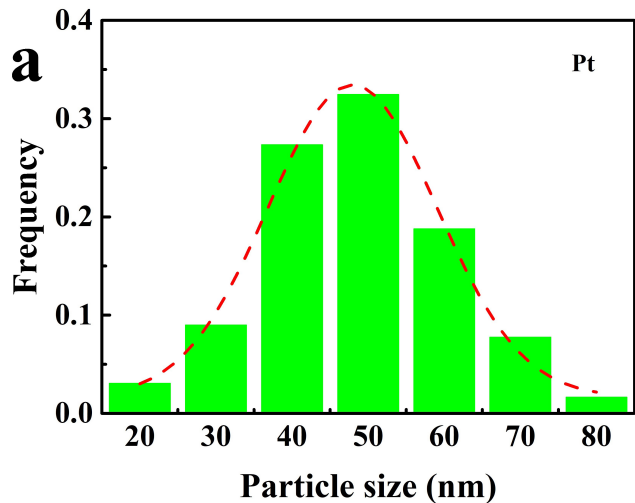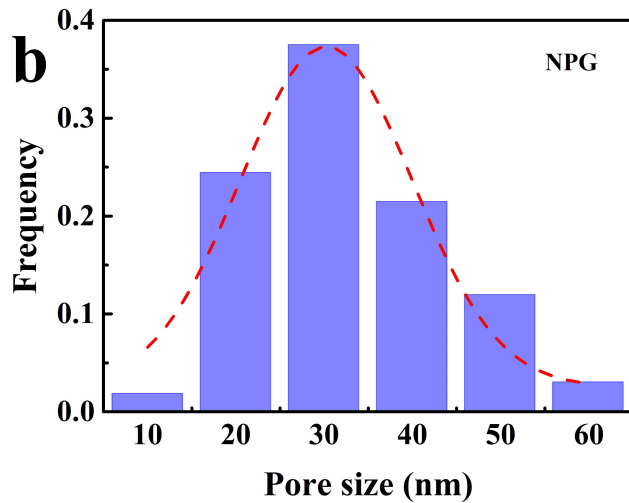

Supplement: d0an01746a3.pdf [file d0an01746a3.pdf]
